# Supplementary material for: Biodegradable Polyurethane Nerve Conduit Functionalized with NDP-MSH-Loaded Self-Assembling Peptide Hydrogel for Peripheral Nerve Regeneration
Source: Royal Society of Chemistry journal article supplement (doi:10.1039/d5tb02626a), 2026-01-01
Supplement: d5tb02626a1.xlsx [file d5tb02626a1.xlsx]

## Sheet: Figure 1D release
Time point	ph7.4_1	ph7.4_2	ph7.4_3	ph6.0_1	ph6.0_2	ph6.0_3
0	0	0	0	0	0	0
2	12.3	17.8	14.5	32.2	30.9	26.8
4	21.8	24.5	22.6	68.5	65.9	60.5
6	32.8	35.9	36.8	84.8	85.6	80.6
8	51.2	54.5	50.9	90.2	88.3	87.2
10	67.2	62.9	61.9	93.2	94.5	95.9
12	75.6	76.8	70.1	97.2	96.5	95.8
14	85.5	86.8	84.3	98.3	97.2	98.6
16	90.1	92.6	88.7	99.1	98.2	99.6

## Sheet: Figure 1H
Group	M1	M2	M3	M4	M5
BWPU (wet)	10.1105	13.4327	12.5975	11.7249	9.7844
SAP@BWPU	11.5762	13.0082	10.048	14.6085	13.5592
NDP-MSH@SAP@BWPU	13.505	13.1901	12.0248	9.84437	15.2858

## Sheet: Figure 2A
Group (μg/ml)	OD1	OD2	OD3	OD4
0	2.508	2.65	2.501	2.489
25	2.541	2.601	2.489	2.511
50	2.548	2.389	2.612	2.566
100	2.541	2.412	2.456	2.621
200	2.641	2.479	2.501	2.511
400	2.548	2.507	2.403	2.468
600	2.432	2.487	2.39	2.386
800	2.478	2.35	2.401	2.308
1000	2.401	2.289	2.21	2.32
1200	2.159	2.43	2.41	2.25
1400	2.205	2.156	2.136	2.189
1600	2.088	2.12	2.058	1.958

## Sheet: Figure 2B
H2O2 (μM)	OD1	OD2	OD3	OD4
0	2.554	2.651	2.456	2.509
50	2.612	2.621	2.586	2.501
100	2.339	2.456	2.389	2.484
200	2.271	2.331	2.327	2.372
400	2.105	2.097	2.276	2.058
600	1.843	1.978	2.259	2.124
800	1.682	1.797	1.849	1.877
1000	1.384	1.249	1.271	1.331

## Sheet: Figure 2C
Group (μg/ml)	H2O2	OD1	OD2	OD3	OD4
0	-	2.732	2.689	2.603	2.599
0	+	1.7	1.825	1.769	1.912
25	+	1.855	1.958	1.826	2.047
50	+	2.158	2.099	2.208	2.019
100	+	2.286	2.309	2.222	2.298
200	+	2.368	2.451	2.405	2.312
400	+	2.455	2.412	2.309	2.356
600	+	2.322	2.298	2.386	2.256

## Sheet: Figure 2D
Group (μg/ml)	H2O2	FI1	FI2	FI3	FI4	FI5	FI6
0	-	33	34	33	38	40	49
200	-	32	44	41	40	35	43
0	+	64	78	82	67	72	80
200	+	46	51	46	50	42	53

## Sheet: Figure 3B
Group (μg/ml)	H2O2	Apoptosis1	Apoptosis2	Apoptosis3	Apoptosis4	Apoptosis5
0	-	0.0173	0.0288	0.0356	0.0189	0.0344
200	-	0.0156	0.0279	0.0276	0.0321	0.0209
0	+	0.1022	0.0903	0.0941	0.1389	0.1301
200	+	0.0359	0.0503	0.0418	0.0569	0.0433

## Sheet: Figure 3C LDH
Group (μg/ml)	H2O2	C1	C2	C3	C4	C5			OD	0.115	0.147	0.189	0.278	0.451	0.617	0.783	0.925
0	-	13.6367	13.0928	12.6698	13.1532	12.5489			mU/ml	0	2.5	5	10	20	30	40	50
200	-	12.6094	13.2741	12.4281	12.005	11.8842
0	+	21.7344	17.6856	18.8942	17.9877	16.6582
200	+	15.4496	14.7244	15.9935	14.7849	15.0266

## Sheet: Figure 3D NRF2
Group (μg/ml)	H2O2	Expression1	Expression2	Expression3	Expression4	Expression5
0	-	0.8122	0.8872	0.9372	0.9872	1.0622
200	-	0.5677	0.7845	0.9645	1.1445	1.3612
0	+	1.3361	1.6351	1.8344	2.0336	2.2326
200	+	2.0447	2.2455	2.3655	2.4855	2.6862

## Sheet: Figure 3E HMOX1
Group (μg/ml)	H2O2	Expression1	Expression2	Expression3	Expression4	Expression5
0	-	0.167	0.249	0.3093	0.3696	0.4516
200	-	0.247	0.287	0.3119	0.3369	0.3769
0	+	0.703	0.813	0.8732	0.9334	1.0434
200	+	1.12	1.24	1.3214	1.4028	1.5228

[truncated: 22 more sheets: Figure 3F NQO1, Figure 3G BAX, Figure 3H BCL2, Figure 4B, Figure 4D,  Figure 5E tunel, Figure 5F CC3, Figure 6B ARG1, Figure 6C CD206, Figure 6E CD86, Figure 6F iNOS, Figure 7C SFI, Figure 7E, Figure 7G, Figure 7H, Figure 7I, Figure 7K CMAP, Figure 7L NCV, Figure 8B, Figure 8C …]
